# Supplementary material
Source: HighWire-hosted journal article supplement (https://bmjopen.bmj.com/content/15/3/e092020)
Supplement: inline-supplementary-material-1 [file inline-supplementary-material-1.pdf]

**Supplementary materials:****Nakazawa S, et al. Association of occupational physical activity and sedentary behaviour with the risk of hepatocellular carcinoma: A case-control study based inpatients data from a nation-wide hospital group in Japan**

|                                                                                                                                                                     |    |
|---------------------------------------------------------------------------------------------------------------------------------------------------------------------|----|
| Supplementary Figure 1. Dataset diagram. ....                                                                                                                       | 3  |
| Supplementary Methods: Japan Standard Occupational Classification (JSOC) and Japan Standard Industrial Classification (JSIC) [1,2].....                             | 4  |
| Supplementary Methods: OPA .....                                                                                                                                    | 5  |
| Supplementary Methods: Sedentary time (ST) .....                                                                                                                    | 7  |
| Supplementary Figure 2. ST according to occupational and industrial exposure .....                                                                                  | 9  |
| Supplementary Methods: Alcohol consumption.....                                                                                                                     | 12 |
| Supplementary Table 2. Top 10 primary diagnosis of controls .....                                                                                                   | 14 |
| Supplementary Table 3. Background characteristics of men.....                                                                                                       | 15 |
| Supplementary Table 4. Background characteristics of women.....                                                                                                     | 17 |
| Supplementary Table 5. Regional characteristics of patients .....                                                                                                   | 18 |
| Supplementary Table 6. Details of liver diseases in the cases.....                                                                                                  | 19 |
| Supplementary Table 7. Characteristics of alcohol consumption and occupation in cases .....                                                                         | 20 |
| Supplementary Table 8. Characteristics of alcohol consumption and occupation in controls .....                                                                      | 21 |
| Supplementary Table 9. OPA and the risk of HCC stratified with alcohol consumption amount (per week and per day) in men without HBV/HCV infection.....              | 22 |
| Supplementary Table 10. OPA and the risk of HCC stratified with alcohol consumption amount (per week and per day) in women without HBV/HCV infection. ....          | 24 |
| Supplementary Table 11. Sedentary time and the risk of HCC stratified with alcohol consumption amount (per week and per day) in men without HBV/HCV infection. .... | 26 |

|                                                                                                                                                                  |    |
|------------------------------------------------------------------------------------------------------------------------------------------------------------------|----|
| Supplementary Table 12. Sedentary time and the risk of HCC stratified with alcohol consumption amount (per week and per day) in women without HBV/HCV infection. | 28 |
| Supplementary Table 13. OPA and the risk of HCC stratified with metabolic diseases in men without HBV/HCV infection and ALD. ....                                | 30 |
| Supplementary Table 14. OPA and the risk of HCC stratified with metabolic diseases in women without HBV/HCV infection and ALD .....                              | 32 |
| Supplementary Table 15. OPA and the risk of HCC stratified with number of metabolic diseases in participants without HBV/HCV infection and ALD. ....             | 34 |
| Supplementary Table 16. Sedentary time and the risk of HCC stratified with metabolic diseases in men without HBV/HCV infection and ALD. ....                     | 36 |
| Supplementary Table 17. Sedentary time and the risk of HCC stratified with metabolic diseases in women without HBV/HCV infection and ALD. ....                   | 38 |
| Supplementary Table 18. Sedentary time and the risk of HCC stratified with number of metabolic diseases in participants without HBV/HCV and ALD. ....            | 39 |
| Supplementary Table 19. OPA and the risk of HCC in MASLD and MetALD populations <sup>a</sup> . ....                                                              | 41 |
| Supplementary Table 20. Sedentary time and the risk of HCC in MASLD and MetALD populations <sup>a</sup> . ....                                                   | 42 |
| Supplementary Table 21. Characteristics in the sensitivity analysis which we changed the controls to patients with liver disease. ....                           | 43 |
| Supplementary Table 22. OPA and the risk of HCC in men and women in the sensitivity analysis which we changed the controls with liver disease. ....              | 45 |

Supplementary Figure 1. Dataset diagram.

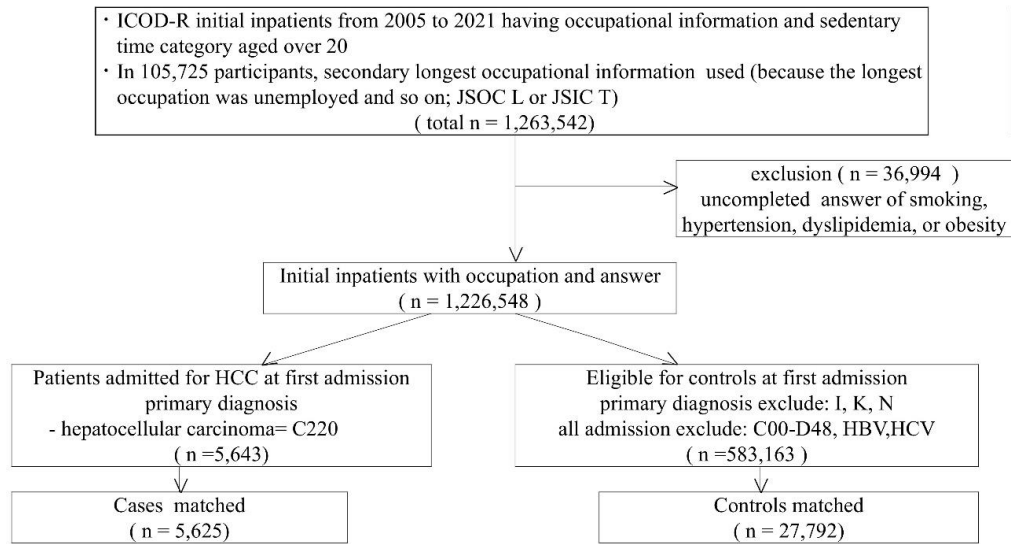

Supplementary Methods: Japan Standard Occupational Classification (JSOC) and Japan Standard Industrial Classification (JSIC) [1,2]

The JSOC categories were as follows: A) managers; B) professionals; C) clerical workers; D) sales workers; E) service workers; F) security workers; G) agricultural, forestry, and fishery workers; H) manufacturing workers; I) transportation workers; J) construction and mining workers; K) carrying, cleaning, and packing workers; and L) students, homemakers, unemployed individuals, and those unclassifiable.

The JSIC categories were as follows: A) Agriculture and forestry; B) Fisheries; C) Mining and quarrying of stone; D) Construction; E) Manufacturing; F) Electricity, gas, heat supply, and water; G) Information and communication; H) Transport and postal services; I) Wholesale and retail trade; J) Finance and Insurance; K) Real estate and goods rental and leasing; L) scientific research, professional, and technical services; M) Accommodations, eating and drinking services; N) Living-related and personal services and amusement services; O) Education and learning support; P) Medical, health care, and welfare; Q) compound services; R) services not classified elsewhere; and S) Government services not classified elsewhere.

Reference)

1. Japanese ministry of internal affairs and communications. Japan standard industrial classification (Rev. 13, October 2013). [https://www.soumu.go.jp/english/dgpp\\_ss/seido/sangyo/san13-1.htm](https://www.soumu.go.jp/english/dgpp_ss/seido/sangyo/san13-1.htm) (Accessed 3 Oct, 2023).
2. Japanese ministry of internal affairs and communications. Japan standard occupational classification (Rev. 5th December 2009). [https://www.soumu.go.jp/english/dgpp\\_ss/seido/shokgyou/co09-2.htm](https://www.soumu.go.jp/english/dgpp_ss/seido/shokgyou/co09-2.htm) (Accessed 3 Oct, 2023).

## Supplementary Methods: OPA

Supplementary Table 1. OPA and occupation

| OPA category defined by Steeves et al. [3] | occupational category in National health and examination survey 2003-2004 [3] | total activity counts (standard error) [3]        | Mean score [3]   | summary rank | JSOC category | OPA category in our study |
|--------------------------------------------|-------------------------------------------------------------------------------|---------------------------------------------------|------------------|--------------|---------------|---------------------------|
| High OPA                                   | Farm and nursery workers                                                      | 434,533 (72,549)                                  | 1                |              | G             | high                      |
|                                            | Other helpers, cleaners, hand packagers, laborers                             | 422,397 (43,719)                                  | 2                |              | K             | high                      |
|                                            | Construction laborers                                                         | 471,863 (54,189)                                  | 3                |              | J             | high                      |
|                                            | Related agricultural, forestry, and fishing                                   | 485,767 (29,836)                                  | 4                |              | G             | high                      |
|                                            | Cleaning and building service occupations                                     | 450,084 (30,591)                                  | 5                |              | K             | high                      |
|                                            | Construction trades                                                           | 424,700 (19,785)                                  | 6                |              | J             | high                      |
|                                            | Freight, stock, and material movers (hand)                                    | 425,193 (22,221)                                  | 7                |              | K             | high                      |
|                                            | Farm operators, managers, and supervisors                                     | 436,923 (295.8)                                   | 8                |              | G             | high                      |
|                                            | Textile, apparel, furnishings machine operators                               | 389,395 (72,764)                                  | 9                |              | H             | medium                    |
|                                            | Machine operators, assorted materials                                         | 356,234 (37,952)                                  | 10               |              | I             | medium                    |
|                                            | Waiters and waitresses                                                        | 332,931 (32,540)                                  | 11               |              | E             | medium                    |
|                                            | Other mechanics and repairers                                                 | 358,301 (15,423)                                  | 12               |              | H             | medium                    |
|                                            | Motor vehicle operators                                                       | 358,903 (21,335)                                  | 13               |              | I             | medium                    |
|                                            | Supervisors and proprietors, sales occupations                                | 346,590 (35,260)                                  | 14               |              | D             | medium                    |
|                                            | intermediate OPA                                                              | Fabricators, assemblers, inspectors, and samplers | 332,848 (17,945) | 15           |               | H                         |

|         |                                                     |                     |    |   |        |
|---------|-----------------------------------------------------|---------------------|----|---|--------|
|         | Other transportation and material moving            | 363,428<br>(19,964) | 16 | K | high   |
|         | Private household occupations                       | 320,474<br>(84,755) | 17 | - | -      |
|         | Vehicle and mobile equip. mechanics, repairers      | 320,773<br>(40,082) | 18 | H | medium |
|         | Material recording, scheduling, distributing clerks | 334,085<br>(60,295) | 19 | C | low    |
|         | Cooks                                               | 298,019<br>(19,802) | 20 | E | medium |
|         | Miscellaneous food preparation and service          | 288,423<br>(20,262) | 21 | E | medium |
|         | Extractive and precision production occupations     | 327,915<br>(17,333) | 22 | H | medium |
|         | Laborers, except construction                       | 305,925<br>(71,578) | 23 | - | -      |
|         | Sales workers, retail and personal services         | 314,124<br>(18,394) | 24 | D | medium |
|         | Health service occupations                          | 290,882<br>(22,132) | 25 | E | medium |
|         | Sales reps., finance, business, & commodities       | 303,648<br>(23,216) | 26 | D | medium |
| Low OPA | Technicians and related support occupations         | 296,734<br>(17,082) | 27 | B | low    |
|         | Information clerks                                  | 280,789<br>(44,557) | 28 | B | low    |
|         | Health diagnosing, assessing and treating           | 284,889<br>(13,572) | 29 | B | low    |
|         | Executive, administrators, and managers             | 293,657<br>(10,403) | 30 | A | low    |
|         | Writers, artists, entertainers, and athletes        | 296,033<br>(30,519) | 31 | B | low    |
|         | Personal service occupations                        | 246,259<br>(19,502) | 32 | E | medium |
|         | Management related occupations                      | 299,487<br>(16,539) | 33 | B | low    |
|         | Teachers                                            | 292,993             | 34 | B | low    |

|                                                  |                     |    |      |        |
|--------------------------------------------------|---------------------|----|------|--------|
|                                                  | (23,268)            |    |      |        |
| Protective service occupations                   | 281,516<br>(33,814) | 35 | F a) | medium |
| Engineers, architects and scientists             | 294,668<br>(33,219) | 36 | B    | low    |
| Miscellaneous administrative support occupations | 277,748<br>(14,067) | 37 | C    | low    |
| Other professional specialty occupations         | 279,639<br>(16,847) | 38 | B    | low    |
| Records processing occupations                   | 243,927<br>(11,345) | 39 | C    | low    |
| Secretaries, stenographers, and typists          | 223,662<br>(15,790) | 40 | C    | low    |

a) Because JSOC F includes self-defence force personnel, so it is classified as medium OPA.

Reference)

3. Steeves JA, Tudor-Locke C, Murphy RA et al. Classification of occupational activity categories using accelerometry: NHANES 2003–2004. *Int J Behav Nutr Phys Act* 2015;12:89.

Supplementary Methods: Sedentary time (ST)

These methodologies were also in article by Sano et al. and Fukai et al. [4,5]

First, we evaluated ST among 40,598 participants who were admitted to the hospitals between 1 April 2020, and 31 March 2021, without missing information regarding sedentary time or occupational information. Their categorised answers about sedentary time were 1 to 5 (1: <1 h, 2: 1–4 h, 3: 4–8 h, 4: 8–12 h, 5: >12 h). We converted the groups to numerical values (category 1, 0.5 h; category 2, 2.5 h; category 3, 6 h; category 4, 10 h; and category 5, 14 h). In addition, we used the analysis of co-variance and calculated the adjusted mean of ST with adjustments for age and sex. We calculated means for each JSOC and JSIC category (a total of 113 occupational groups) and ranked

them as long, medium, and short categories based on the textiles of the adjusted means. We excluded the results from a small number of occupational groups comprising <10 people and the JSOC L categories, such as students, homemakers, unemployed individuals and those unclassifiable. Finally, we adapted the 113 occupational sedentary categories to all participants.

Reference)

4. Fukai K, Sano K, Terauchi R, et al. Developing a Job-Exposure Matrix for Sedentary Behavior: A Study Based on the Inpatient Clinico-Occupational Database of Rosai Hospital Group. *J Occup Environ Med.* 2025;67(1):73-7.
5. Sano K, Fukai K, Terauchi R, et al. Association between ocular diseases and screen time and sedentary time derived from job-exposure matrices. *Sci Rep.* 2024;14(1):27042.



Supplementary Figure 2. ST according to occupational and industrial exposure

|   |   |   |   |   |   |   |   |   |   |   |   |   |
|---|---|---|---|---|---|---|---|---|---|---|---|---|
|   | A | B | C | D | E | F | G | H | I | J | K |   |
| A | L | L | M |   |   |   | L |   |   |   | L | A |
| B | L |   |   |   |   |   | L |   |   |   |   | B |
| C |   |   |   |   |   |   |   |   |   | L |   | C |
| D | M | M | S | M |   |   | L | L | S | L | L | D |
| E | M | S | S | M | L | S |   | L | M | M | L | E |
| F | M | M | S | S |   | S |   | M |   | L |   | F |
| G | S | S | S | S |   |   |   | S |   | M |   | G |
| H | S | S | S | S | L | S |   | M | S | S | L | H |
| I | M | M | S | L | L | M |   | M | L | L | L | I |
| J | S | S | S | M |   |   |   | S |   |   |   | J |
| K | M | S | S | M | M | S |   | S |   |   | L | K |
| L | S | S | S | M | M | L |   | S |   | L | L | L |
| M | M | M | S | L | L | S |   | S |   |   | L | M |
| N | M | L | S | M | L | M |   | S | S |   | L | N |
| O | M | M | S |   | M | L |   | M | S |   | L | O |
| P | M | M | S | M | L | M |   | M | L |   | M | P |
| Q | M | M | S | L | L |   | L | L |   |   | L | Q |
| R | M | M | S | M | L | M | L | M | M | M | L | R |
| S | S | S | S |   | L | M |   | S | L |   | L | S |
|   | A | B | C | D | E | F | G | H | I | J | K |   |

occupations

|   |           |
|---|-----------|
| L | Long ST   |
| M | Medium ST |
| S | Short ST  |

**Japan standard occupational classification**

|   |                                             |
|---|---------------------------------------------|
| A | Managers                                    |
| B | Professionals                               |
| C | Clerical workers                            |
| D | Sales workers                               |
| E | Security workers                            |
| F | Agricultural, forestry, and fishery workers |
| G | Manufacturing workers                       |
| H | Transport and postal services               |
| I | Transportation workers                      |
| J | Construction and mining workers             |
| K | Carrying, cleaning, and packing workers     |

**Japan standard industrial classification**

|   |                                                             |
|---|-------------------------------------------------------------|
| A | Agriculture and forestry                                    |
| B | Fisheries                                                   |
| C | Mining and quarrying of stone                               |
| D | Construction                                                |
| E | Manufacturing                                               |
| F | Electricity, gas, heat supply and water                     |
| G | Information and communication                               |
| H | Transport and postal services                               |
| I | Wholesale and retail trade                                  |
| J | Finance and Insurance                                       |
| K | Real estate and goods rental and leasing                    |
| L | Scientific research, professional and technical services    |
| M | Accommodations, eating and drinking services                |
| N | Living-related and personal services and amusement services |
| O | Education, learning support                                 |
| P | Medical, health care and welfare                            |
| Q | Compound services                                           |
| R | Services not classified elsewhere                           |
| S | Government services not classified elsewhere                |

## Supplementary Methods: Alcohol consumption

The questionnaire contained the following questions regarding alcohol consumption.

| Question                           | Answer                                                                                | Calculation of frequency per week |
|------------------------------------|---------------------------------------------------------------------------------------|-----------------------------------|
| Until March 2016<br>Drinking habit | I have never drunk alcohol.                                                           | 0                                 |
|                                    | I used to drink but stopped.                                                          | 3                                 |
|                                    | I have only drunk occasionally.                                                       | 3                                 |
|                                    | I used to drink almost daily, but now drink occasionally.                             | 7                                 |
| Drinking duration                  | I drink almost daily.                                                                 | 7                                 |
|                                    | Age at drinking initiation and age at drinking termination                            |                                   |
| Average quantity per day           | Alcohol amount converted into Japanese sake amount (1 unit=20 g pure ethanol) per day |                                   |
| From April 2016<br>Drinking habit  | I have never drunk alcohol.                                                           | 0                                 |
|                                    | I cannot drink alcohol.                                                               | 0                                 |
|                                    | I used to drink daily but stopped now.                                                | 7                                 |
|                                    | I drink once or twice a week                                                          | 2                                 |
|                                    | I drink almost daily (more than 4 times a week)                                       | 5                                 |
|                                    | I drink daily (7 times a week)                                                        | 7                                 |

|                          |                                                                                                                                                                                              |
|--------------------------|----------------------------------------------------------------------------------------------------------------------------------------------------------------------------------------------|
| Drinking duration        | Age at drinking initiation and age at drinking termination                                                                                                                                   |
| Average quantity per day | Less than 1 unit (converted into Japanese sake amount, 1 unit = 22 g pure ethanol)<br>More than 1 unit and less than 2 units<br>More than 2 units and less than 3 units<br>More than 3 units |

---

We used the quantity of alcohol converted to pure ethanol equivalent in grams. The data from April 2016 were converted into continuous variables (10 g ethanol, 30 g ethanol, 50 g ethanol and 65 g ethanol). We calculated the amount of alcohol consumed per weeks by multiplying the daily amount by frequency per week. Furthermore, the ALD amount was defined as alcohol consumption of over 60 g per day and over 420 g per week in men and over 50 g per day and over 350 g per week in women. MetALD amount was defined as alcohol consumption of 30–60 g per day and 210–420 g per week in men and 20–50 g per day and 140–350 g per week in women. Finally, the low MetALD amount was defined as alcohol consumption of below 30 g per day and below 210 g per week in men and below 20 g per day and below 140 g per week in women.

ALD, alcohol-related liver disease; MASLD, metabolic dysfunction-associated steatotic liver disease; MetALD, MASLD with a higher alcohol intake; OPA, occupational physical activity; ST, sedentary time

Supplementary Table 2. Top 10 primary diagnosis of controls

| Ranking | primary diagnosis                                                      | ICD-10 code | Number | Percentage (%) <sup>a</sup> |
|---------|------------------------------------------------------------------------|-------------|--------|-----------------------------|
| 1       | Senile cataract                                                        | H25.0       | 1727   | 6.21                        |
| 2       | spinal canal stenosis of the lumbar spine                              | M48.0       | 1651   | 5.94                        |
| 3       | Geriatric cataract, unknown details                                    | H25.9       | 882    | 3.17                        |
| 4       | Pneumonia, unknown details                                             | J18.9       | 633    | 2.28                        |
| 5       | Other explicit disc herniation(displacement)                           | M51.2       | 596    | 2.14                        |
| 6       | Insulin-independent diabetes mellitus<br><NIDDM> without complications | E11.9       | 541    | 1.95                        |
| 7       | Geriatric nuclear cataract                                             | H25.1       | 489    | 1.76                        |
| 8       | Fracture of the thigh bone, closed                                     | S72.00      | 473    | 1.70                        |
| 9       | Other spondylolisthesis with myelopathy<br>(spinal cord disorder)      | M47.1       | 456    | 1.64                        |
| 10      | Lumbar spondylolisthesis                                               | M43.1       | 404    | 1.45                        |

a) Number of diagnosis / all controls × 100

ICD-10, International Statistical Classification of Diseases and Related Health Problems, Tenth Revision

Supplementary Table 3. Background characteristics of men

|                                               | Patients      | Controls       |
|-----------------------------------------------|---------------|----------------|
| Population, no.                               | 4,085         | 20,114         |
| Age, years                                    | 69.5±9.8      | 69.5±9.9       |
| Smoking status                                |               |                |
| Never                                         | 811 (19.9%)   | 5,229 (26%)    |
| Former                                        | 1,948 (47.7%) | 9,722 (48.3%)  |
| Current                                       | 1,326 (32.5%) | 5,163 (25.7%)  |
| Alcohol use                                   |               |                |
| ALD (week)                                    | 154 (3.8%)    | 382 (1.9%)     |
| MetALD (week)                                 | 928 (22.7%)   | 4,159 (20.7%)  |
| Low MetALD (week)                             | 3,003 (73.5%) | 15,573 (77.4%) |
| ALD (day)                                     | 238 (5.8%)    | 557 (2.8%)     |
| MetALD (day)                                  | 1,350 (33%)   | 5,590 (27.8%)  |
| Low MetALD (day)                              | 2,497 (61.1%) | 13,967 (69.4%) |
| Diagnose of hypertension, yes                 | 1,566 (38.3%) | 7,606 (37.8%)  |
| Diagnose of type 2 diabetes, yes              | 559 (13.7%)   | 2,267 (11.3%)  |
| Diagnose of dyslipidaemia, yes                | 203 (5%)      | 2,326 (11.6%)  |
| Obesity, yes                                  | 362 (8.9%)    | 2,192 (10.9%)  |
| Occupational physical activity of longest job |               |                |
| Low OPA                                       | 1,132 (27.7%) | 6,012 (29.9%)  |
| Medium                                        | 1,823 (44.6%) | 8,808 (43.8%)  |
| High OPA                                      | 791 (19.4%)   | 3,747 (18.6%)  |
| Uncategorized                                 | 339 (8.3%)    | 1,547 (7.7%)   |
| Sedentary time                                |               |                |
| Long                                          | 1,054(25.8%)  | 5,177(25.7%)   |
| Medium                                        | 756(18.5%)    | 4,233(21%)     |
| Short                                         | 1,934(47.3%)  | 9,151(45.5%)   |
| Uncategorized                                 | 341(8.3%)     | 1,553(7.7%)    |
| HBV                                           | 511 (12.5%)   | 0 (0%)         |
| HCV                                           | 1,670 (40.9%) | 0 (0%)         |

a) Percentage may not add up to 100 because of rounding.

ALD, alcohol-related liver disease; HBV, hepatitis B virus; HCV, hepatitis C virus;

MASLD, metabolic dysfunction-associated steatotic liver disease; MetALD, MASLD

with a higher alcohol intake; OPA, occupational physical activity; ST, sedentary time



Supplementary Table 4. Background characteristics of women

|                                               | Patients      | Controls      |
|-----------------------------------------------|---------------|---------------|
| Population, no.                               | 1,540         | 7,678         |
| Age, years                                    | 73.2±9.8      | 73.2±9.8      |
| Smoking status                                |               |               |
| Never                                         | 1,245 (80.8%) | 6,678 (87%)   |
| Former                                        | 158 (10.3%)   | 585 (7.6%)    |
| Current                                       | 137 (8.9%)    | 415 (5.4%)    |
| Alcohol use                                   |               |               |
| ALD (weeks)                                   | 16 (1%)       | 27 (0.4%)     |
| MetALD (weeks)                                | 80 (5.2%)     | 371 (4.8%)    |
| LowMetALD (weeks)                             | 1,444 (93.8%) | 7,280 (94.8%) |
| ALD (days)                                    | 28 (1.8%)     | 42 (0.5%)     |
| MetALD (days)                                 | 243 (15.8%)   | 1,190 (15.5%) |
| Low MetALD (days)                             | 1,269 (82.4%) | 6,446 (84%)   |
| Diagnose of hypertension, yes                 | 667 (43.3%)   | 3,058 (39.8%) |
| Diagnose of type 2 diabetes, yes              | 166 (10.8%)   | 587 (7.6%)    |
| Diagnose of dyslipidaemia, yes                | 79 (5.1%)     | 1,022 (13.3%) |
| Obesity, yes                                  | 137 (8.9%)    | 731 (9.5%)    |
| Occupational physical activity of longest job |               |               |
| Low OPA                                       | 347 (22.5%)   | 1,677 (21.8%) |
| Medium OPA                                    | 508 (33%)     | 2,178 (28.4%) |
| High OPA                                      | 118 (7.7%)    | 738 (9.6%)    |
| Uncategorized                                 | 567 (36.8%)   | 3,085 (40.2%) |
| Sedentary time                                |               |               |
| Long ST                                       | 253(16.4%)    | 1,136(14.8%)  |
| Medium ST                                     | 142(9.2%)     | 802(10.4%)    |
| Short ST                                      | 577(37.5%)    | 2,654(34.6%)  |
| Uncategorized                                 | 568(36.9%)    | 3,086(40.2%)  |
| HBV                                           | 151 (9.8%)    | 0 (0%)        |
| HCV                                           | 719 (46.7%)   | 0 (0%)        |

a) Percentage may not add up to 100 because of rounding.

ALD, alcohol-related liver disease; HBV, hepatitis B virus; HCV, hepatitis C virus;

MASLD, metabolic dysfunction-associated steatotic liver disease; MetALD, MASLD

with a higher alcohol intake; OPA, occupational physical activity; ST, sedentary time

Supplementary Table 5. Regional characteristics of patients

|                 | Patients | ALD (%) <sup>a</sup> | HBV (%) <sup>b</sup> | HCV (%) <sup>c</sup> |
|-----------------|----------|----------------------|----------------------|----------------------|
| Region          |          |                      |                      |                      |
| Hokkaido        | 304      | 2.0                  | 3.4                  | 6.0                  |
| Tohoku          | 848      | 1.8                  | 1.5                  | 6.7                  |
| Kanto           | 786      | 1.7                  | 1.5                  | 7.2                  |
| Chubu           | 414      | 1.7                  | 1.8                  | 6.6                  |
| Kansai          | 1,476    | 1.9                  | 1.8                  | 8.1                  |
| Chugoku-shikoku | 1,055    | 2.1                  | 2.4                  | 6.2                  |
| Kyushu          | 742      | 0.77                 | 2.3                  | 7.9                  |

a) Patients with ALD amount alcohol consumption / patients in the region (ALD amount is defined as alcohol consumption over 420 g per week in men and over 350 g per week in women)

b) Patients with HBV / patients in the region

c) Patients with HCV / patients in the region

ALD, alcohol-related liver disease; HBV, hepatitis B virus; HCV, hepatitis C virus

Supplementary Table 6. Details of liver diseases in the cases

|                                                                                                       | Number (%)   |
|-------------------------------------------------------------------------------------------------------|--------------|
| Total number of HCC patients at admission of diagnosis                                                | 5625 (100%)  |
| with liver disease (K70-77) at diagnosis                                                              | 2216 (39.4%) |
| without liver disease (K70-77) at diagnosis                                                           | 3409 (60.6%) |
| (their did not have liver diagnosis at diagnosis of HCC, however, they have it during all admissions) | 1084 (19.3%) |
| HBV positive                                                                                          | 662 (11.8%)  |
| HCV positive                                                                                          | 2389 (42.5%) |
| no HBV /HCV /liver disease (K70-77) a)                                                                | 1397 (24.8%) |

a) 131 cases had the diagnosis of type 2 diabetes. 391 cases had only HCC diagnosis at first time admission.

HBV, hepatitis B virus; HCV, hepatitis C virus

Supplementary Table 7. Characteristics of alcohol consumption and occupation in cases

|                                                     | OPA    | case ALD      | MetALD     | low<br>MetALD | Z a)    | P a)         |
|-----------------------------------------------------|--------|---------------|------------|---------------|---------|--------------|
| A Managers                                          | Low    | 301 17(5.65%) | 70(23.3%)  | 214(71.1%)    | -3.38   | 0.0007<br>b) |
| B Professionals                                     | Low    | 472 14(2.97%) | 96(20.3%)  | 362(76.7%)    | -1.25   | 0.2112       |
| C Clerical workers<br>(reference)                   | Low    | 706 17(2.41%) | 126(17.8%) | 563(79.7%)    | - (ref) | -            |
| D Sales workers                                     | Medium | 525 20(3.81%) | 88(16.8%)  | 417(79.4%)    | -0.6    | 0.542        |
| E Security workers                                  | Medium | 377 15(3.98%) | 65(17.2%)  | 297(78.8%)    | -0.8    | 0.416        |
| F Agricultural,<br>forestry, and fishery<br>workers | Medium | 75 1(1.33%)   | 19(25.3%)  | 55(73.3%)     | -0.9    | 0.353        |
| G Manufacturing<br>workers                          | High   | 245 5(2.04%)  | 51(20.8%)  | 189(77.1%)    | -0.6    | 0.525        |
| H Transport and<br>postal services                  | Medium | 982 30(3.05%) | 183(18.6%) | 769(78.3%)    | -0.9    | 0.386        |
| I Transportation<br>workers                         | Medium | 372 17(4.57%) | 89(23.9%)  | 266(71.5%)    | -3.2    | 0.001<br>b)  |
| J Construction and<br>mining workers                | High   | 460 19(4.13%) | 116(25.2%) | 325(70.7%)    | -3.6    | 0.0004<br>b) |
| K Carrying, cleaning,<br>and packing<br>workers     | High   | 204 5(2.45%)  | 37(18.1%)  | 162(79.4%)    | -0.1    | 0.920        |

a) Cochran-Armitage tests were performed compared to clerical workers as reference.

b) Two-sided p value was <0.05 in Cochran-Armitage test.

ALD, alcohol-related liver disease; MASLD, metabolic dysfunction-associated steatotic liver disease; MetALD, MASLD with a higher alcohol intake

Supplementary Table 8. Characteristics of alcohol consumption and occupation in controls

|                                               | OPA    | control ALD | metALD    | low MetALD | Z a)               | P a)      |
|-----------------------------------------------|--------|-------------|-----------|------------|--------------------|-----------|
| A Managers                                    | Low    | 1439        | 23(1.6%)  | 284(19.7%) | 1132(78.7%)-2.8    | 0.006 b)  |
| B Professionals                               | Low    | 2725        | 29(1.06%) | 479(17.6%) | 2217(81.4%)-0.5    | 0.591     |
| C Clerical workers (reference)                | Low    | 3525        | 54(1.53%) | 566(16.1%) | 2905(82.4%)- (ref) | -         |
| D Sales workers                               | Midium | 2675        | 41(1.53%) | 496(18.5%) | 2138(79.9%)-2.2    | 0.027 b)  |
| E Security workers                            | Midium | 1421        | 42(2.96%) | 220(15.5%) | 1159(81.6%)-1.6    | 0.104     |
| F Agricultural, forestry, and fishery workers | Midium | 447         | 8(1.79%)  | 99(22.1%)  | 340(76.1%) -3.0    | 0.003 b)  |
| G Manufacturing workers                       | High   | 1475        | 22(1.49%) | 198(13.4%) | 1255(85.1%)2.1     | 0.039 b)  |
| H Transport and postal services               | Midium | 4874        | 70(1.44%) | 911(18.7%) | 3893(79.9%)-2.5    | 0.012 b)  |
| I Transportation workers                      | Midium | 1569        | 27(1.72%) | 365(23.3%) | 1177(75%) -5.6     | <.0001 b) |
| J Construction and mining workers             | High   | 2077        | 46(2.21%) | 502(24.2%) | 1529(73.6%)-7.5    | <.0001 b) |
| K Carrying, cleaning, and packing workers     | High   | 933         | 26(2.79%) | 137(14.7%) | 770(82.5%) -0.7    | 0.481     |

a) Cochran-Armitage tests were performed compared to clerical workers as reference.

b) Two-sided p value was <0.05 in Cochran-Armitage test.

ALD, alcohol-related liver disease; MASLD, metabolic dysfunction-associated steatotic liver disease; MetALD, MASLD with a higher alcohol intake

Supplementary Table 9. OPA and the risk of HCC stratified with alcohol consumption amount (per week and per day) in men without HBV/HCV infection

| Men                                       | OR (95% CI) |                      |                         |                         |
|-------------------------------------------|-------------|----------------------|-------------------------|-------------------------|
|                                           | Patients    | Model 1 <sup>a</sup> | Model 2 <sup>b</sup>    | Model 3 <sup>c</sup>    |
| In participants without HBV/HCV infection |             |                      |                         |                         |
| ALD level: >420 g per week                |             |                      |                         |                         |
| Low OPA                                   | 28          | 1(reference)         | 1(reference)            | 1(reference)            |
| Medium OPA                                | 56          | 0.67 (0.11–3.99)     | 1.75 (0.11–29.3)        | 2.36 (0.18–30.3)        |
| High OPA                                  | 19          | _ <sup>d</sup>       | _ <sup>d</sup>          | _ <sup>d</sup>          |
| MetALD level: 210–420 g per week          |             |                      |                         |                         |
| Low OPA                                   | 175         | 1 (reference)        | 1 (reference)           | 1 (reference)           |
| Medium OPA                                | 204         | 0.73 (0.53–1.01)     | <b>0.72 (0.52–0.99)</b> | <b>0.70 (0.50–0.97)</b> |
| High OPA                                  | 109         | 0.97 (0.66–1.42)     | 0.93 (0.63–1.38)        | 0.96 (0.64–1.43)        |
| Low MetALD level: <210 g per week         |             |                      |                         |                         |
| Low OPA                                   | 400         | 1 (reference)        | 1 (reference)           | 1 (reference)           |
| Medium OPA                                | 560         | 0.96 (0.83–1.12)     | 0.95 (0.82–1.11)        | 0.94 (0.81–1.09)        |
| High OPA                                  | 244         | 0.92 (0.76–1.1)      | 0.93 (0.77–1.12)        | 0.91 (0.76–1.1)         |
| In participants without HBV/HCV infection |             |                      |                         |                         |
| ALD level: >60 g per day                  |             |                      |                         |                         |
| Low OPA                                   | 37          | 1 (reference)        | 1 (reference)           | 1 (reference)           |
| Medium OPA                                | 77          | 0.57 (0.13–2.43)     | 0.67 (0.15–3.02)        | 0.60 (0.12–3.16)        |
| High OPA                                  | 29          | 0.83 (0.12–5.8)      | 1.01 (0.12–8.81)        | 0.71 (0.057–8.73)       |
| MetALD level: 30–60 g per day             |             |                      |                         |                         |
| Low OPA                                   | 250         | 1 (reference)        | 1 (reference)           | 1 (reference)           |
| Medium OPA                                | 306         | 0.86 (0.67–1.09)     | 0.84 (0.66–1.08)        | 0.82 (0.64–1.05)        |
| High OPA                                  | 144         | 0.89 (0.66–1.2)      | 0.86 (0.64–1.16)        | 0.85 (0.63–1.15)        |
| Low MetALD amount: <30 g per day          |             |                      |                         |                         |
| Low OPA                                   | 316         | 1 (reference)        | 1 (reference)           | 1 (reference)           |
| Medium OPA                                | 437         | 0.92 (0.78–1.10)     | 0.92 (0.77–1.09)        | 0.92 (0.77–1.09)        |
| High OPA                                  | 199         | 0.92 (0.75–1.14)     | 0.93 (0.75–1.14)        | 0.92 (0.75–1.14)        |

a) Conditional logistic regression matched for sex, age, admission date, and admitting hospital.

b) Additional adjustment for smoking in Model 1.

c) Additional adjustment for diagnosis of hypertension, type 2 diabetes, dyslipidaemia,

and obesity in Model 2.

d) ORs and 95% CIs could not be calculated because of insufficient number of cases and matched controls.

ALD, alcohol-related liver disease; CI, confidence interval; HBV, hepatitis B virus; HCC, hepatocellular carcinoma; HCV, hepatitis C virus; MASLD, metabolic dysfunction-associated steatotic liver disease; MetALD, MASLD with a higher alcohol intake; OR, odds ratio; OPA, occupational physical activity

Supplementary Table 10. OPA and the risk of HCC stratified with alcohol consumption amount (per week and per day) in women without HBV/HCV infection.

| Women                                     | OR (95% CI) |                         |                         |                         |
|-------------------------------------------|-------------|-------------------------|-------------------------|-------------------------|
|                                           | Patients    | Model 1 <sup>a</sup>    | Model 2 <sup>b</sup>    | Model 3 <sup>c</sup>    |
| In participants without HBV/HCV infection |             |                         |                         |                         |
| ALD level: >350 g per week                |             |                         |                         |                         |
| Low OPA                                   | 4           | – <sup>d</sup>          | – <sup>d</sup>          | – <sup>d</sup>          |
| Medium OPA                                | 5           | – <sup>d</sup>          | – <sup>d</sup>          | – <sup>d</sup>          |
| High OPA                                  | 0           | – <sup>d</sup>          | – <sup>d</sup>          | – <sup>d</sup>          |
| MetALD level: 140–350 g/week              |             |                         |                         |                         |
| Low OPA                                   | 7           | – <sup>d</sup>          | – <sup>d</sup>          | – <sup>d</sup>          |
| Medium OPA                                | 18          | – <sup>d</sup>          | – <sup>d</sup>          | – <sup>d</sup>          |
| High OPA                                  | 0           | – <sup>d</sup>          | – <sup>d</sup>          | – <sup>d</sup>          |
| Low MetALD level: <140 g per week         |             |                         |                         |                         |
| Low OPA                                   | 147         | 1 (reference)           | 1 (reference)           | 1 (reference)           |
| Medium OPA                                | 205         | 1.09 (0.86–1.38)        | 1.06 (0.83–1.34)        | 1.03 (0.81–1.31)        |
| High OPA                                  | 48          | 0.73 (0.51–1.04)        | 0.71 (0.49–1.02)        | <b>0.69 (0.48–0.99)</b> |
| In participants without HBV/HCV infection |             |                         |                         |                         |
| ALD level: >50 g per day                  |             |                         |                         |                         |
| Low OPA                                   | 4           | – <sup>d</sup>          | – <sup>d</sup>          | – <sup>d</sup>          |
| Medium OPA                                | 5           | – <sup>d</sup>          | – <sup>d</sup>          | – <sup>d</sup>          |
| High OPA                                  | 0           | – <sup>d</sup>          | – <sup>d</sup>          | – <sup>d</sup>          |
| MetALD level: 20–50 g per day             |             |                         |                         |                         |
| Low OPA                                   | 24          | 1 (reference)           | 1 (reference)           | 1 (reference)           |
| Medium OPA                                | 44          | 2.04 (0.90–4.64)        | 2.11 (0.88–5.03)        | 2.49 (0.98–6.31)        |
| High OPA                                  | 7           | 0.77 (0.18–3.28)        | 0.91 (0.21–3.96)        | 0.95 (0.20–4.53)        |
| Low MetALD level: <20 g per day           |             |                         |                         |                         |
| Low OPA                                   | 130         | 1 (reference)           | 1 (reference)           | 1 (reference)           |
| Medium OPA                                | 179         | 1.05 (0.81–1.36)        | 1.01 (0.78–1.31)        | 0.97 (0.75–1.26)        |
| High OPA                                  | 41          | <b>0.66 (0.45–0.98)</b> | <b>0.64 (0.43–0.95)</b> | <b>0.62 (0.42–0.93)</b> |

a) Conditional logistic regression matched for sex, age, admission date, and admitting hospital.

b) Additional adjustment for smoking in Model 1.

c) Additional adjustment for diagnosis of hypertension, type 2 diabetes, dyslipidaemia,



and obesity in Model 2.

d) ORs and 95% CIs could not be calculated because of insufficient number of cases and matched controls.

ALD, alcohol-related liver disease; CI, confidence interval; HBV, hepatitis B virus; HCC, hepatocellular carcinoma; HCV, hepatitis C virus; MASLD, metabolic dysfunction-associated steatotic liver disease; MetALD, MASLD with a higher alcohol intake; OR, odds ratio; OPA, occupational physical activity

Supplementary Table 11. Sedentary time and the risk of HCC stratified with alcohol consumption amount (per week and per day) in men without HBV/HCV infection.

| Men                                       | OR (95% CI) |                      |                      |                      |
|-------------------------------------------|-------------|----------------------|----------------------|----------------------|
|                                           | Patients    | Model 1 <sup>a</sup> | Model 2 <sup>b</sup> | Model 3 <sup>c</sup> |
| In participants without HBV/HCV infection |             |                      |                      |                      |
| ALD level: >420 g per week                |             |                      |                      |                      |
| Long ST                                   | 58          | 1 (reference)        | 1 (reference)        | 1 (reference)        |
| Medium ST                                 | 17          | 3.06 (0.20–46.6)     | 2.08 (0.13–33)       | 3.56 (0.11–113)      |
| Short ST                                  | 28          | 0.71 (0.087–5.8)     | 0.77 (0.088–6.62)    | 0.95 (0.087–10.3)    |
| MetALD level: 210–420 g per week          |             |                      |                      |                      |
| Long ST                                   | 224         | 1 (reference)        | 1 (reference)        | 1 (reference)        |
| Medium ST                                 | 108         | 0.88 (0.59–1.3)      | 0.86 (0.58–1.28)     | 0.84 (0.56–1.26)     |
| Short ST                                  | 156         | 0.75 (0.54–1.04)     | 0.74 (0.53–1.03)     | 0.73 (0.52–1.03)     |
| Low MetALD level: <210 g per week         |             |                      |                      |                      |
| Long ST                                   | 586         | 1 (reference)        | 1 (reference)        | 1 (reference)        |
| Medium ST                                 | 266         | 0.90 (0.76–1.08)     | 0.91 (0.76–1.09)     | 0.91 (0.76–1.09)     |
| Short ST                                  | 351         | 0.92 (0.79–1.07)     | 0.93 (0.79–1.08)     | 0.92 (0.79–1.08)     |
| In participants without HBV/HCV infection |             |                      |                      |                      |
| ALD level: >60 g per day                  |             |                      |                      |                      |
| Long ST                                   | 77          | 1 (reference)        | 1 (reference)        | 1 (reference)        |
| Medium ST                                 | 27          | 1.65 (0.30–9)        | 1.49 (0.27–8.37)     | 2.51 (0.31–20)       |
| Short ST                                  | 39          | 0.74 (0.16–3.38)     | 0.72 (0.15–3.47)     | 0.51 (0.065–4.05)    |
| MetALD level: 30–60 g per day             |             |                      |                      |                      |
| Long ST                                   | 323         | 1 (reference)        | 1 (reference)        | 1 (reference)        |
| Medium ST                                 | 157         | 0.87 (0.64–1.18)     | 0.85 (0.62–1.15)     | 0.85 (0.62–1.16)     |
| Short ST                                  | 220         | 0.83 (0.64–1.06)     | 0.82 (0.64–1.05)     | 0.82 (0.63–1.06)     |
| Low MetALD level: <30 g per day           |             |                      |                      |                      |
| Long ST                                   | 468         | 1 (reference)        | 1 (reference)        | 1 (reference)        |
| Medium ST                                 | 207         | 0.88 (0.71–1.08)     | 0.88 (0.71–1.09)     | 0.87 (0.71–1.08)     |
| Short ST                                  | 276         | 0.91 (0.76–1.08)     | 0.92 (0.77–1.09)     | 0.91 (0.76–1.09)     |

a) Conditional logistic regression matched for sex, age, admission date, and admitting hospital.

b) Additional adjustment for smoking in Model 1.

c) Additional adjustment for diagnosis of hypertension, type 2 diabetes, dyslipidaemia,

and obesity in Model 2.

d) ORs and 95% CIs could not be calculated because of insufficient number of cases and matched controls.

ALD, alcohol-related liver disease; CI, confidence interval; HBV, hepatitis B virus; HCC, hepatocellular carcinoma; HCV, hepatitis C virus; MASLD, metabolic dysfunction-associated steatotic liver disease; MetALD, MASLD with a higher alcohol intake; OR, odds ratio; OPA, occupational physical activity; ST, sedentary time

Supplementary Table 12. Sedentary time and the risk of HCC stratified with alcohol consumption amount (per week and per day) in women without HBV/HCV infection.

| Women                             |          | OR (95% CI)             |                         |                         |
|-----------------------------------|----------|-------------------------|-------------------------|-------------------------|
|                                   | Patients | Model 1 <sup>a</sup>    | Model 2 <sup>b</sup>    | Model 3 <sup>c</sup>    |
| In participants without HBV/HCV   |          |                         |                         |                         |
| ALD level: >350 g per week        |          |                         |                         |                         |
| Long ST                           | 5        | _d                      | _d                      | _d                      |
| Medium ST                         | 2        | _d                      | _d                      | _d                      |
| Short ST                          | 2        | _d                      | _d                      | _d                      |
| MetALD level: 140–350 g/week      |          |                         |                         |                         |
| Long ST                           | 17       | 1 (reference)           | 1 (reference)           | _d                      |
| Medium ST                         | 3        | _d                      | _d                      | _d                      |
| Short ST                          | 5        | 1.41 (0.085–23.6)       | 2.55 (0.21–31.4)        | _d                      |
| Low MetALD level: <140 g per week |          |                         |                         |                         |
| Long ST                           | 233      | 1 (reference)           | 1 (reference)           | 1 (reference)           |
| Medium ST                         | 57       | <b>0.67 (0.47–0.96)</b> | <b>0.66 (0.46–0.94)</b> | <b>0.68 (0.47–0.97)</b> |
| Short ST                          | 109      | 0.90 (0.70–1.16)        | 0.87 (0.67–1.13)        | 0.86 (0.66–1.12)        |
| in participants without HBV/HCV   |          |                         |                         |                         |
| ALD level: >50 g per day          |          |                         |                         |                         |
| Long ST                           | 5        | _d                      | _d                      | _d                      |
| Medium ST                         | 2        | _d                      | _d                      | _d                      |
| Short ST                          | 3        | _d                      | _d                      | _d                      |
| MetALD level: 20–50 g per day     |          |                         |                         |                         |
| Long ST                           | 47       | 1 (reference)           | 1 (reference)           | 1 (reference)           |
| Medium ST                         | 10       | 0.88 (0.25–3.08)        | 0.84 (0.22–3.24)        | 1.07 (0.26–4.37)        |
| Short ST                          | 18       | 1.72 (0.70–4.24)        | 1.69 (0.65–4.35)        | 2 (0.74–5.43)           |
| Low MetALD level: <20 g per day   |          |                         |                         |                         |
| Long ST                           | 203      | 1 (reference)           | 1 (reference)           | 1 (reference)           |
| Medium ST                         | 50       | <b>0.66 (0.45–0.96)</b> | <b>0.65 (0.44–0.95)</b> | <b>0.67 (0.45–0.98)</b> |
| Short ST                          | 96       | 0.86 (0.65–1.13)        | 0.82 (0.62–1.09)        | 0.82 (0.62–1.08)        |

a) Conditional logistic regression matched for sex, age, admission date, and admitting hospital.

b) Additional adjustment for smoking in Model 1.

c) Additional adjustment for diagnosis of hypertension, type 2 diabetes, dyslipidaemia,

and obesity in Model 2.

d) ORs and 95% CIs could not be calculated because of insufficient number of cases and matched controls.

ALD, alcohol-related liver disease; CI, confidence interval; HBV, hepatitis B virus; HCC, hepatocellular carcinoma; HCV, hepatitis C virus; MASLD, metabolic dysfunction-associated steatotic liver disease; MetALD, MASLD with a higher alcohol intake; OPA, occupational physical activity; OR, odds ratio; ST, sedentary time

Supplementary Table 13. OPA and the risk of HCC stratified with metabolic diseases in men without HBV/HCV infection and ALD.

| Men        | Patients OR (95% CI) |                                            | Patients OR (95% CI) |                                               |
|------------|----------------------|--------------------------------------------|----------------------|-----------------------------------------------|
|            |                      | With hypertension <sup>a</sup>             |                      | Without hypertension <sup>a</sup>             |
| Low OPA    | 261                  | 1 (reference)                              | 314                  | 1 (reference)                                 |
| Medium OPA | 315                  | 0.82 (0.66–1.02)                           | 449                  | 0.95 (0.80–1.13)                              |
| High OPA   | 150                  | 1.03 (0.78–1.35)                           | 203                  | 0.99 (0.80–1.22)                              |
|            |                      | Patients With type 2 diabetes <sup>b</sup> |                      | Patients Without type 2 diabetes <sup>b</sup> |
| Low OPA    | 89                   | 1 (reference)                              | 486                  | 1 (reference)                                 |
| Medium OPA | 119                  | 0.66 (0.37–1.18)                           | 645                  | <b>0.86 (0.75–0.98)</b>                       |
| High OPA   | 44                   | 1.43 (0.63–3.26)                           | 309                  | 0.94 (0.80–1.11)                              |
|            |                      | Patients With dyslipidaemia <sup>c</sup>   |                      | Patients Without dyslipidaemia <sup>c</sup>   |
| Low OPA    | 56                   | 1 (reference)                              | 519                  | 1 (reference)                                 |
| Medium OPA | 42                   | 1.22 (0.52–2.87)                           | 722                  | 0.89 (0.78–1.01)                              |
| High OPA   | 20                   | 1.96 (0.48–7.99)                           | 333                  | 0.93 (0.80–1.09)                              |
|            |                      | Patients With obesity <sup>d</sup>         |                      | Patients Without obesity <sup>d</sup>         |
| Low OPA    | 89                   | 1 (reference)                              | 486                  | 1 (reference)                                 |
| Medium OPA | 79                   | 0.63 (0.33–1.21)                           | 685                  | 0.90 (0.79–1.03)                              |
| High OPA   | 26                   | 1.73 (0.69–4.33)                           | 327                  | 0.97 (0.83–1.14)                              |

a) Conditional logistic regression matched for sex, age, admission date, and admitting hospital and adjustment for smoking, diagnosis of type 2 diabetes, dyslipidaemia, and obesity.

b) Conditional logistic regression matched for sex, age, admission date, and admitting hospital and adjustment for smoking, diagnosis of hypertension, dyslipidaemia, and obesity.

c) Conditional logistic regression matched for sex, age, admission date, and admitting hospital and adjustment for smoking, diagnosis of hypertension, type 2 diabetes, and obesity.

d) Conditional logistic regression matched for sex, age, admission date, and admitting hospital and adjustment for smoking, diagnosis of hypertension, type 2 diabetes, and dyslipidaemia.

ALD, alcohol-related liver disease; CI, confidence interval; HBV, hepatitis B virus; HCC, hepatocellular carcinoma; HCV, hepatitis C virus; OPA, occupational physical activity;

OR, odds ratio

Supplementary Table 14. OPA and the risk of HCC stratified with metabolic diseases in women without HBV/HCV infection and ALD

| Women      | Patients | Odds ratio (95% confidence interval) | Patients | Odds ratio (95% confidence interval) |
|------------|----------|--------------------------------------|----------|--------------------------------------|
|            |          | With hypertension <sup>a</sup>       |          | Without hypertension <sup>a</sup>    |
| Low OPA    | 66       | 1(reference)                         | 88       | 1(reference)                         |
| Medium OPA | 109      | 1.16 (0.78–1.71)                     | 114      | 0.93 (0.66–1.31)                     |
| High OPA   | 27       | 0.85 (0.48–1.5)                      | 21       | <b>0.49 (0.28–0.87)</b>              |
|            | Patients | With type 2 diabetes <sup>b</sup>    | Patients | Without type 2 diabetes <sup>b</sup> |
| Low OPA    | 31       | 1(reference)                         | 219      | 1(reference)                         |
| Medium OPA | 6        | 4.00 (0.68–23.5)                     | 54       | 1.01 (0.79–1.3)                      |
| High OPA   | 11       | 0.56 (0.032–10)                      | 103      | 0.69 (0.47–1.00)                     |
|            | Patients | With dyslipidaemia <sup>c</sup>      | Patients | Without dyslipidaemia <sup>c</sup>   |
| Low OPA    | 18       | 1 (reference)                        | 232      | 1(reference)                         |
| Medium OPA | 7        | - <sup>d</sup>                       | 53       | 1.05 (0.82–1.35)                     |
| High OPA   | 9        | - <sup>d</sup>                       | 105      | 0.72 (0.50–1.05)                     |
|            | Patients | With obesity <sup>e</sup>            | Patients | Without obesity <sup>e</sup>         |
| Low OPA    | 18       | 1(reference)                         | 136      | 1(reference)                         |
| Medium OPA | 31       | 1.66 (0.44–6.22)                     | 192      | 1.03 (0.8–1.32)                      |
| High OPA   | 5        | 2.27 (0.077–66.9)                    | 43       | 0.71 (0.48–1.04)                     |

a) Conditional logistic regression matched for sex, age, admission date, and admitting hospital and adjustment for smoking, diagnosis of type 2 diabetes, dyslipidaemia, and obesity.

b) Conditional logistic regression matched for sex, age, admission date, and admitting hospital and adjustment for smoking, diagnosis of hypertension, dyslipidaemia, and obesity.

c) Conditional logistic regression matched for sex, age, admission date, and admitting hospital and adjustment for smoking, diagnosis of hypertension, type 2 diabetes, and obesity.

d) ORs and 95% CIs could not be calculated because of insufficient number of cases and matched controls.



e) Conditional logistic regression matched for sex, age, admission date, and admitting hospital and adjustment for smoking, diagnosis of hypertension, type 2 diabetes, and dyslipidaemia.

ALD, alcohol-related liver disease; CI, confidence interval; HBV, hepatitis B virus; HCC, hepatocellular carcinoma; HCV, hepatitis C virus; OPA, occupational physical activity; OR, odds ratio

Supplementary Table 15. OPA and the risk of HCC stratified with number of metabolic diseases in participants without HBV/HCV infection and ALD.

|            |     | OR (95% CI) <sup>a</sup>          |  | OR (95% CI) <sup>a</sup>          |                         |
|------------|-----|-----------------------------------|--|-----------------------------------|-------------------------|
|            |     | Patients                          |  | Patients                          |                         |
| Men        |     | No factor                         |  | One factor                        |                         |
| Low OPA    | 236 | 1(reference)                      |  | 227                               | 1(reference)            |
| Medium OPA | 374 | 0.98 (0.80–1.2)                   |  | 258                               | <b>0.73 (0.57–0.94)</b> |
| High OPA   | 167 | 0.90 (0.70–1.15)                  |  | 141                               | 0.97 (0.72–1.31)        |
|            |     | Two factors                       |  | Three factors                     |                         |
| Low OPA    | 73  | 1(reference)                      |  | 34                                | 1(reference)            |
| Medium OPA | 103 | 1.50 (0.75–2.99)                  |  | 25                                | 0.36 (0.027–4.76)       |
| High OPA   | 36  | 1.82 (0.73–4.55)                  |  | 9                                 | – <sup>b</sup>          |
|            |     | Four factors                      |  |                                   |                         |
| Low OPA    | 5   | – <sup>b</sup>                    |  |                                   |                         |
| Medium OPA | 4   | – <sup>b</sup>                    |  |                                   |                         |
| High OPA   | 0   | – <sup>b</sup>                    |  |                                   |                         |
|            |     | Patients OR (95% CI) <sup>a</sup> |  | Patients OR (95% CI) <sup>a</sup> |                         |
| Women      |     | No factor                         |  | One factor                        |                         |
| Low OPA    | 74  | 1(reference)                      |  | 55                                | 1(reference)            |
| Medium OPA | 96  | 1.04 (0.71–1.52)                  |  | 81                                | 1.01 (0.63–1.63)        |
| High OPA   | 19  | 0.59 (0.32–1.09)                  |  | 22                                | 1.12 (0.58–2.15)        |
|            |     | Two factors                       |  | Three factors                     |                         |
| Low OPA    | 17  | 1(reference)                      |  | 7                                 | 1(reference)            |
| Medium OPA | 34  | 2.76 (0.62–12.3)                  |  | 10                                | 0.29 (0.01–8.32)        |
| High OPA   | 6   | 1.77 (0.31–10.2)                  |  | 1                                 | – <sup>b</sup>          |
|            |     | Four factors                      |  |                                   |                         |
| Low OPA    | 1   | – <sup>b</sup>                    |  |                                   |                         |
| Medium OPA | 2   | – <sup>b</sup>                    |  |                                   |                         |
| High OPA   | 0   | – <sup>b</sup>                    |  |                                   |                         |

a) Conditional logistic regression matched for sex, age, admission date, and admitting hospital and additional adjustment for smoking.

b) ORs and 95% CIs could not be calculated because of insufficient number of cases and matched controls.

ALD, alcohol-related liver disease; CI, confidence interval; HBV, hepatitis B virus; HCC, hepatocellular carcinoma; HCV, hepatitis C virus; OPA, occupational physical activity; OR, odds ratio

Supplementary Table 16. Sedentary time and the risk of HCC stratified with metabolic diseases in men without HBV/HCV infection and ALD.

| Men       | Patients OR (95% CI) |                                   | Patients OR (95% CI) |                                      |
|-----------|----------------------|-----------------------------------|----------------------|--------------------------------------|
|           |                      | With hypertension <sup>a</sup>    |                      | Without hypertension <sup>a</sup>    |
| Long ST   | 334                  | 1(reference)                      | 476                  | 1(reference)                         |
| Medium ST | 171                  | 1.03 (0.80–1.34)                  | 203                  | 0.91 (0.73–1.13)                     |
| Short ST  | 221                  | 0.91 (0.73–1.15)                  | 286                  | 0.94 (0.79–1.12)                     |
|           |                      | With type 2 diabetes <sup>b</sup> |                      | Without type 2 diabetes <sup>b</sup> |
| Long ST   | 107                  | 1(reference)                      | 703                  | 1(reference)                         |
| Medium ST | 67                   | 1.02 (0.55–1.91)                  | 307                  | 0.91 (0.77–1.07)                     |
| Short ST  | 78                   | 1.08 (0.60–1.93)                  | 429                  | 0.89 (0.78–1.02)                     |
|           |                      | With dyslipidaemia <sup>c</sup>   |                      | Without dyslipidaemia <sup>c</sup>   |
| Long ST   | 47                   | 1(reference)                      | 763                  | 1(reference)                         |
| Medium ST | 28                   | 0.73 (0.26–2.06)                  | 346                  | 0.93 (0.79–1.09)                     |
| Short ST  | 43                   | 1.07 (0.39–2.92)                  | 464                  | 0.90 (0.79–1.03)                     |
|           |                      | With obesity <sup>d</sup>         |                      | Without obesity <sup>d</sup>         |
| Long ST   | 69                   | 1(reference)                      | 741                  | 1(reference)                         |
| Medium ST | 56                   | 0.61 (0.28–1.33)                  | 318                  | 0.89 (0.76–1.05)                     |
| Short ST  | 69                   | 0.67 (0.34–1.31)                  | 438                  | 0.92 (0.80–1.05)                     |

a) Conditional logistic regression matched for sex, age, admission date, and admitting hospital and adjustment for smoking, diagnosis of type 2 diabetes, dyslipidaemia, and obesity.

b) Conditional logistic regression matched for sex, age, admission date, and admitting hospital and adjustment for smoking, diagnosis of hypertension, dyslipidaemia, and obesity.

c) Conditional logistic regression matched for sex, age, admission date, and admitting hospital and adjustment for smoking, diagnosis of hypertension, type 2 diabetes, and obesity.

d) Conditional logistic regression matched for sex, age, admission date, and admitting hospital and adjustment for smoking, diagnosis of hypertension, type 2 diabetes, and dyslipidaemia.

ALD, alcohol-related liver disease; CI, confidence interval; HBV, hepatitis B virus; HCC,

hepatocellular carcinoma; HCV, hepatitis C virus; OR, odds ratio; ST, sedentary time

Supplementary Table 17. Sedentary time and the risk of HCC stratified with metabolic diseases in women without HBV/HCV infection and ALD.

| Women     | Patients | OR (95% CI)                       | Patients | OR (95% CI)                          |
|-----------|----------|-----------------------------------|----------|--------------------------------------|
|           |          | With hypertension <sup>a</sup>    |          | Without hypertension <sup>a</sup>    |
| Long ST   | 125      | 1(reference)                      | 125      | 1(reference)                         |
| Medium ST | 28       | 0.81 (0.45–1.44)                  | 32       | <b>0.56 (0.34–0.94)</b>              |
| Short ST  | 48       | 1.02 (0.66–1.57)                  | 66       | 0.73 (0.51–1.06)                     |
|           |          | With type 2 diabetes <sup>b</sup> |          | Without type 2 diabetes <sup>b</sup> |
| Long ST   | 31       | 1(reference)                      | 219      | 1(reference)                         |
| Medium ST | 6        | 1.52 (0.044–52.1)                 | 54       | <b>0.68 (0.47–0.98)</b>              |
| Short ST  | 11       | 9.67 (0.35–265)                   | 103      | 0.86 (0.66–1.12)                     |
|           |          | With dyslipidaemia <sup>c</sup>   |          | Without dyslipidaemia <sup>c</sup>   |
| Long ST   | 18       | 1(reference)                      | 232      | 1(reference)                         |
| Medium ST | 7        | 0.27 (0.011–6.87)                 | 53       | 0.65 (0.45–0.94)                     |
| Short ST  | 9        | 8.65 (0.20–382)                   | 105      | 0.86 (0.66–1.12)                     |
|           |          | With obesity <sup>d</sup>         |          | Without obesity <sup>d</sup>         |
| Long ST   | 33       | 1(reference)                      | 217      | 1(reference)                         |
| Medium ST | 11       | 1.97 (0.20–19.6)                  | 49       | 0.55 (0.38–0.80)                     |
| Short ST  | 10       | 2.23 (0.42–11.8)                  | 104      | 0.79 (0.60–1.04)                     |

a) Conditional logistic regression matched for sex, age, admission date, and admitting hospital and adjustment for smoking, diagnosis of type 2 diabetes, dyslipidaemia, and obesity.

b) Conditional logistic regression matched for sex, age, admission date, and admitting hospital and adjustment for smoking, diagnosis of hypertension, dyslipidaemia, and obesity.

c) Conditional logistic regression matched for sex, age, admission date, and admitting hospital and adjustment for smoking, diagnosis of hypertension, type 2 diabetes, and obesity.

d) Conditional logistic regression matched for sex, age, admission date, and admitting hospital and adjustment for smoking, diagnosis of hypertension, type 2 diabetes, and dyslipidaemia.

ALD, alcohol-related liver disease; CI, confidence interval; HBV, hepatitis B virus; HCC, hepatocellular carcinoma; HCV, hepatitis C virus; OR, odds ratio; ST, sedentary time

Supplementary Table 18. Sedentary time and the risk of HCC stratified with number of metabolic diseases in participants without HBV/HCV and ALD.

|           |     | OR (95% CI) <sup>a</sup> |             | OR (95% CI) <sup>a</sup> |                  |
|-----------|-----|--------------------------|-------------|--------------------------|------------------|
|           |     | Patients                 |             | Patients                 |                  |
| Men       |     | No factor                |             | One factor               |                  |
| Long ST   | 398 | 1(reference)             |             | 294                      | 1(reference)     |
| Medium ST | 160 | 1.04 (0.80–1.35)         |             | 137                      | 0.90 (0.67–1.2)  |
| Short ST  | 218 | 0.96 (0.80–1.18)         |             | 195                      | 0.86 (0.67–1.1)  |
|           |     | Two factors              |             | Three factors            |                  |
| Long ST   | 93  | 1(reference)             |             | 23                       | 1 (reference)    |
| Medium ST | 50  | 0.80 (0.37–1.73)         |             | 23                       | - <sup>b</sup>   |
| Short ST  | 69  | 1.40 (0.70–2.77)         |             | 22                       | 1.3 (0.61–2.77)  |
|           |     | Four factors             |             |                          |                  |
| Long ST   | 2   | - <sup>b</sup>           |             |                          |                  |
| Medium ST | 4   | - <sup>b</sup>           |             |                          |                  |
| Short ST  | 3   | - <sup>b</sup>           |             |                          |                  |
|           |     | Patients                 | OR (95% CI) | Patients                 | OR (95% CI)      |
| Women     |     | No factor                |             | One factor               |                  |
| Long ST   | 106 | 1(reference)             |             | 94                       | 1(reference)     |
| Medium ST | 24  | <b>0.4 (0.22–0.73)</b>   |             | 25                       | 0.88 (0.46–1.69) |
| Short ST  | 59  | 0.70 (0.47–1.05)         |             | 38                       | 0.99 (0.59–1.66) |
|           |     | Two factors              |             | Three factors            |                  |
| Long ST   | 39  | 1(reference)             |             | 9                        | 1(reference)     |
| Medium ST | 6   | 0.67 (0.043–10.4)        |             | 5                        | - <sup>b</sup>   |
| Short ST  | 12  | 1.7 (0.41–7.15)          |             | 4                        | - <sup>b</sup>   |
|           |     | Patients Four factors    |             |                          |                  |
| Long ST   | 3   | - <sup>b</sup>           |             |                          |                  |
| Medium ST | 0   | - <sup>b</sup>           |             |                          |                  |
| Short ST  | 0   | - <sup>b</sup>           |             |                          |                  |

a) Conditional logistic regression matched for sex, age, admission date, and admitting hospital and additional adjustment for smoking.

b) ORs and 95% CIs could not be calculated because of insufficient number of cases and matched controls.

ALD, alcohol-related liver disease; CI, confidence interval; HBV, hepatitis B virus; HCC, hepatocellular carcinoma; HCV, hepatitis C virus; OR, odds ratio; ST, sedentary time



Supplementary Table 19. OPA and the risk of HCC in MASLD and MetALD populations<sup>a</sup>.

| MASLD and MetALD | Patients | OR (95% CI)             |                         |
|------------------|----------|-------------------------|-------------------------|
|                  |          | Model 1                 | Model 2                 |
| <b>Men</b>       |          |                         |                         |
| Low OPA          | 339      | 1 (reference)           | 1 (reference)           |
| Medium OPA       | 390      | <b>0.82 (0.68–0.98)</b> | <b>0.80 (0.67–0.96)</b> |
| High OPA         | 186      | 1.03 (0.82–1.28)        | 1.02 (0.81–1.28)        |
| <b>Women</b>     |          |                         |                         |
| Low OPA          | 80       | 1 (reference)           | 1 (reference)           |
| Medium OPA       | 127      | 1.22 (0.87–1.72)        | 1.14 (0.81–1.62)        |
| High OPA         | 29       | 0.91 (0.55–1.5)         | 0.82 (0.49–1.37)        |

a) MASLD and MetALD population = population without HBV/HCV, without ALD, and who had hypertension, diabetes, dyslipidaemia, or obesity.

b) Conditional logistic regression matched for sex, age, admission date, and admitting hospital and additional adjustment for smoking.

c) Additional adjustment for smoking in Model 1.

ALD, alcohol-related liver disease; CI, confidence interval; HBV, hepatitis B virus; HCC, hepatocellular carcinoma; HCV, hepatitis C virus; MASLD, metabolic dysfunction-associated steatotic liver disease; MetALD, MASLD with a higher alcohol intake; OPA, occupational physical activity; OR, odds ratio; ST, sedentary time

Supplementary Table 20. Sedentary time and the risk of HCC in MASLD and MetALD populations<sup>a</sup>.

| MASLD and MetALD |          | OR (95% CI)      |                  |
|------------------|----------|------------------|------------------|
| Men              | Patients | Model 1          | Model 2          |
| Long ST          | 412      | 1 (reference)    | 1 (reference)    |
| Medium ST        | 214      | 0.95 (0.77–1.17) | 0.95 (0.76–1.17) |
| Short ST         | 289      | 0.90 (0.75–1.08) | 0.91 (0.75–1.09) |
| <b>Women</b>     |          |                  |                  |
| Long ST          | 144      | 1 (reference)    | 1 (reference)    |
| Medium ST        | 36       | 0.92 (0.56–1.51) | 0.88 (0.54–1.46) |
| Short ST         | 55       | 1.14 (0.78–1.66) | 1.05 (0.71–1.53) |

- a) MASLD and MetALD population = population without HBV/HCV, without ALD, and who had hypertension, diabetes, dyslipidaemia, or obesity.
- b) Conditional logistic regression matched for sex, age, admission date, and admitting hospital and additional adjustment for smoking.
- c) Additional adjustment for smoking in Model 1.

ALD, alcohol-related liver disease; CI, confidence interval; HBV, hepatitis B virus; HCC, hepatocellular carcinoma; HCV, hepatitis C virus; MASLD, metabolic dysfunction-associated steatotic liver disease; MetALD, MASLD with a higher alcohol intake; OR, odds ratio; ST, sedentary time

Supplementary Table 21. Characteristics in the sensitivity analysis which we changed the controls to patients with liver disease.

|                                               | Cases         | Controls      |
|-----------------------------------------------|---------------|---------------|
| Population, no.                               | 3,383         | 3,383         |
| Male                                          | 2,336         | 2,336         |
| Age,y                                         | 68.4±9.9      | 68.3±9.9      |
| Smoking status                                |               |               |
| Never                                         | 1,260 (37.2%) | 1,399 (41.4%) |
| Former                                        | 1,186 (35.1%) | 1,040 (30.7%) |
| Current                                       | 937 (27.7%)   | 944 (27.9%)   |
| Alcohol use                                   |               |               |
| ALD (week)                                    | 107 (3.2%)    | 188 (5.6%)    |
| MetALD (week)                                 | 647 (19.1%)   | 765 (22.6%)   |
| under MetALD (week)                           | 2,629 (77.7%) | 2,430 (71.8%) |
| ALD (day)                                     | 172 (5.1%)    | 244 (7.2%)    |
| MetALD(day)                                   | 987 (29.2%)   | 1,040 (30.7%) |
| under MetALD (day)                            | 2,224 (65.7%) | 2,099 (62%)   |
| Diagnose of hypertension, yes                 | 1,330 (39.3%) | 1,384 (40.9%) |
| Diagnose of type 2 diabetes, yes              | 479 (14.2%)   | 609 (18%)     |
| Diagnose of dyslipidemia, yes                 | 192 (5.7%)    | 543 (16.1%)   |
| obesity, yes                                  | 327 (9.7%)    | 369 (10.9%)   |
| Occupational physical activity of longest job |               |               |
| Low OPA                                       | 865 (25.6%)   | 874 (25.8%)   |
| Middle OPA                                    | 1,376 (40.7%) | 1,304 (38.5%) |
| High OPA                                      | 566 (16.7%)   | 550 (16.3%)   |
| uncategorized                                 | 576 (17%)     | 655 (19.4%)   |
| Sedentary time                                |               |               |
| Long                                          | 770(22.8%)    | 760(22.5%)    |
| Midium                                        | 512(15.1%)    | 524(15.5%)    |
| Short                                         | 1,524(45%)    | 1,443(42.7%)  |
| uncategorized                                 | 577(17.1%)    | 656(19.4%)    |
| HBV                                           | 474 (14%)     | 67 (2%)       |
| HCV                                           | 1,410 (41.7%) | 271 (8%)      |

a) Percentage may not add up to 100 because of rounding.

ALD, alcohol-related liver disease; HBV, hepatitis B virus; HCV, hepatitis C virus; MASLD, metabolic dysfunction-associated steatotic liver disease; MetALD, MASLD with a higher alcohol intake; OPA, occupational physical activity; ST, sedentary time

Supplementary Table 22. OPA and the risk of HCC in men and women in the sensitivity analysis which we changed the controls with liver disease.

|                                 | Patients | Odds ratio (95% confidence interval) |                       |                       |
|---------------------------------|----------|--------------------------------------|-----------------------|-----------------------|
|                                 |          | Model 1 <sup>a)</sup>                | Model 2 <sup>b)</sup> | Model 3 <sup>c)</sup> |
| <b>All men</b>                  |          |                                      |                       |                       |
| Low OPA                         | 632      | 1(reference)                         | 1(reference)          | 1(reference)          |
| Medium OPA                      | 1,031    | 1.05 (0.91–1.21)                     | 1.05 (0.91–1.22)      | 0.98 (0.85–1.14)      |
| High OPA                        | 477      | 1.07 (0.90–1.27)                     | 1.08 (0.91–1.29)      | 1 (0.83–1.2)          |
| stratified by HBV/HCV infection |          |                                      |                       |                       |
| With HBV/HCV infection          |          |                                      |                       |                       |
| Low OPA                         | 308      | 1(reference)                         | 1(reference)          | 1(reference)          |
| Medium OPA                      | 578      | 0.55 (0.28–1.07)                     | 0.57 (0.29–1.13)      | 0.53 (0.26–1.08)      |
| High OPA                        | 270      | 0.54 (0.26–1.12)                     | 0.55 (0.26–1.18)      | 0.46 (0.21–1.03)      |
| Without HBV/HCV infection       |          |                                      |                       |                       |
| Low OPA                         | 324      | 1(reference)                         | 1(reference)          | 1(reference)          |
| Medium OPA                      | 453      | 0.86 (0.69–1.07)                     | 0.86 (0.69–1.08)      | 0.83 (0.66–1.03)      |
| High OPA                        | 207      | 1.02 (0.78–1.33)                     | 1.03 (0.78–1.36)      | 0.98 (0.74–1.3)       |
| <b>All women</b>                |          |                                      |                       |                       |
| Low OPA                         | 233      | 1(reference)                         | 1(reference)          | 1(reference)          |
| Medium OPA                      | 345      | 1.16 (0.90–1.48)                     | 1.11 (0.86–1.42)      | 1.04 (0.79–1.35)      |
| High OPA                        | 89       | 0.95 (0.66–1.34)                     | 0.89 (0.63–1.28)      | 0.77 (0.53–1.13)      |
| stratified by HBV/HCV infection |          |                                      |                       |                       |
| With HBV/HCV infection          |          |                                      |                       |                       |
| Low OPA                         | 128      | 1(reference)                         | 1(reference)          | 1(reference)          |
| Medium OPA                      | 187      | 0.95 (0.41–2.24)                     | 0.92 (0.38–2.25)      | 0.77 (0.29–2.03)      |
| High OPA                        | 53       | 2.65 (0.62–11.4)                     | 2.94 (0.61–14.1)      | 1.54 (0.26–9.22)      |
| Without HBV/HCV infection       |          |                                      |                       |                       |
| Low OPA                         | 182      | 1(reference)                         | 1(reference)          | 1(reference)          |
| Medium OPA                      | 158      | 1.18 (0.80–1.74)                     | 1.17 (0.79–1.73)      | 1.06 (0.70–1.6)       |
| High OPA                        | 36       | 0.77 (0.43–1.37)                     | 0.74 (0.41–1.32)      | 0.62 (0.34–1.15)      |

a) Conditional logistic regression matched for sex, age, admission date, and admitting hospital.

b) Additional adjustment for smoking in Model 1.

c) Additional adjustment for diagnosis of hypertension, type 2 diabetes, dyslipidaemia, and obesity in Model 2.

CI, confidence interval; HBV, hepatitis B virus; HCC, hepatocellular carcinoma; HCV, hepatitis C virus; OPA, occupational physical activity; OR, odds ratio

Supplementary Table 23. SED and the risk of HCC in men and women in the sensitivity analysis which we changed the controls with liver disease.

|                                 | Patients | Odds ratio (95% confidence interval) |                       |                       |
|---------------------------------|----------|--------------------------------------|-----------------------|-----------------------|
|                                 |          | Model 1 <sup>a)</sup>                | Model 2 <sup>b)</sup> | Model 3 <sup>c)</sup> |
| <b>All men</b>                  |          |                                      |                       |                       |
| Long ST                         | 1,125    | 1(reference)                         | 1(reference)          | 1(reference)          |
| Midium ST                       | 417      | 1 (0.84–1.2)                         | 0.99 (0.83–1.19)      | 0.99 (0.82–1.19)      |
| Short ST                        | 597      | 1.06 (0.92–1.22)                     | 1.06 (0.92–1.22)      | 0.98 (0.84–1.14)      |
| stratified by HBV/HCV infection |          |                                      |                       |                       |
| With HBV/HCV infection          |          |                                      |                       |                       |
| Long ST                         | 643      | 1(reference)                         | 1(reference)          | 1(reference)          |
| Midium ST                       | 210      | 1.05 (0.50–2.18)                     | 1.05 (0.49–2.25)      | 1.23 (0.55–2.75)      |
| Short ST                        | 303      | 0.54 (0.28–1.08)                     | 0.57 (0.28–1.14)      | 0.60 (0.29–1.24)      |
| Without HBV/HCV infection       |          |                                      |                       |                       |
| Long ST                         | 482      | 1(reference)                         | 1(reference)          | 1(reference)          |
| Midium ST                       | 207      | 0.98 (0.75–1.28)                     | 0.99 (0.76–1.3)       | 0.96 (0.73–1.26)      |
| Short ST                        | 294      | 0.92 (0.74–1.14)                     | 0.93 (0.75–1.16)      | 0.88 (0.7–1.09)       |
| <b>All women</b>                |          |                                      |                       |                       |
| Long ST                         | 399      | 1(reference)                         | 1(reference)          | 1(reference)          |
| Midium ST                       | 95       | 0.83 (0.59–1.18)                     | 0.82 (0.58–1.17)      | 0.82 (0.57–1.2)       |
| Short ST                        | 173      | 0.99 (0.76–1.3)                      | 0.94 (0.72–1.23)      | 0.86 (0.65–1.14)      |
| stratified by HBV/HCV infection |          |                                      |                       |                       |
| With HBV/HCV infection          |          |                                      |                       |                       |
| Long ST                         | 221      | 1(reference)                         | 1(reference)          | 1(reference)          |
| Midium ST                       | 54       | 0.62 (0.16–2.34)                     | 0.65 (0.17–2.53)      | 0.62 (0.14–2.8)       |
| Short ST                        | 93       | 1.01 (0.38–2.7)                      | 1.02 (0.37–2.83)      | 0.83 (0.28–2.49)      |
| Without HBV/HCV infection       |          |                                      |                       |                       |
| Long ST                         | 178      | 1(reference)                         | 1(reference)          | 1(reference)          |
| Midium ST                       | 41       | 0.78 (0.47–1.31)                     | 0.80 (0.48–1.34)      | 0.83 (0.49–1.42)      |
| Short ST                        | 80       | 0.93 (0.62–1.41)                     | 0.92 (0.61–1.39)      | 0.83 (0.54–1.28)      |

a) Conditional logistic regression matched for sex, age, admission date, and admitting hospital.

b) Additional adjustment for smoking in Model 1.

c) Additional adjustment for diagnosis of hypertension, type 2 diabetes, dyslipidaemia,

and obesity in Model 2.

CI, confidence interval; HBV, hepatitis B virus; HCV, hepatitis C virus; OR, odds ratio;

ST, sedentary time
